# Supplementary material for: Advanced lung cancer inflammation index predicts the outcomes of patients with non-metastatic gastric cancer after radical surgical resection
Source: PubMed Central journal article supplement — J Gastrointest Oncol. 2023 Feb 3;14(1):85–96. doi: 10.21037/jgo-22-657 (PMC10007916; doi:10.21037/jgo-22-657), 2023-02-03
Supplement: jgo-14-01-85-dss.pdf [file jgo-14-01-85-dss.pdf]

## Data Sharing Statement

|                     |                                                                                                                                                     |                                                                                  |
|---------------------|-----------------------------------------------------------------------------------------------------------------------------------------------------|----------------------------------------------------------------------------------|
| <b>Article Info</b> | <a href="https://dx.doi.org/10.21037/jgo-22-657">https://dx.doi.org/10.21037/jgo-22-657</a>                                                         |                                                                                  |
| <b>Item</b>         | <b>Question</b>                                                                                                                                     | <b>Authors' Response<br/>(place "-" if not applicable)</b>                       |
| 1                   | Would you like to share data collected for your study to others?                                                                                    | No. We are sorry.                                                                |
| 2                   | If not, would you like to share the reason for your decision?                                                                                       | According to the policy of our hospital, we can only use this data for analysis. |
| 3                   | What data in particular will be shared?                                                                                                             | -                                                                                |
| 4                   | Any other documents will be shared? Such as study protocol, statistical analysis plan, informed consent form, clinical study report, analytic code. | -                                                                                |
| 5                   | When will data availability begin?                                                                                                                  | -                                                                                |
| 6                   | When will data availability end?                                                                                                                    | -                                                                                |
| 7                   | To whom will you share the data?                                                                                                                    | -                                                                                |
| 8                   | For what type of analysis or purpose?                                                                                                               | -                                                                                |
| 9                   | How or where can the data/documents be obtained?                                                                                                    | -                                                                                |
| 10                  | Any other restrictions?                                                                                                                             | -                                                                                |
